# Supplementary material for: Adsorption of Fluoride onto Acid-Modified Low-Cost Pyrolusite Ore: Adsorption Characteristics and Efficiencies
Source: MDPI journal article supplement (doi:10.3390/ijerph192417103), 2022-12-19
Supplement: s1 [file s1]

# Supplementary Materials

## Adsorption of Fluoride Onto Acid-Modified Low-Cost Pyrolusite Ore: Adsorption Characteristics and Efficiencies

**Phacharapol Induvesa <sup>1</sup>, Radamanee Rattanakom <sup>2</sup>, Sornsiri Sriboonnak <sup>2</sup>, Chayakorn Pumas <sup>3,4</sup>, Kritsana Duangjan <sup>5</sup>, Pharkphum Rakruam <sup>2</sup>, Saoharit Nitayavardhana <sup>2</sup>, Prattakorn Sittisom <sup>2</sup> and Aunnop Wongrueng <sup>2,3,\*</sup>**

<sup>1</sup> Bodhivijjalaya College, Srinakharinwirot University, Nakhon Nayok 26120, Thailand

<sup>2</sup> Department of Environmental Engineering, Faculty of Engineering, Chiang Mai University, Chiang Mai 50200, Thailand

<sup>3</sup> Research Center in Bioresources for Agriculture, Industry and Medicine, Chiang Mai University, Chiang Mai 50200, Thailand

<sup>4</sup> Department of Biology, Faculty of Science, Chiang Mai University, Chiang Mai 50200, Thailand

<sup>5</sup> Science and Technology Research Institute, Chiang Mai University, Chiang Mai 50200, Thailand

\* Correspondence: [aunnop@eng.cmu.ac.th](mailto:aunnop@eng.cmu.ac.th); Tel.: +66-53-94-4101-3; Fax: +66-53-94-4105

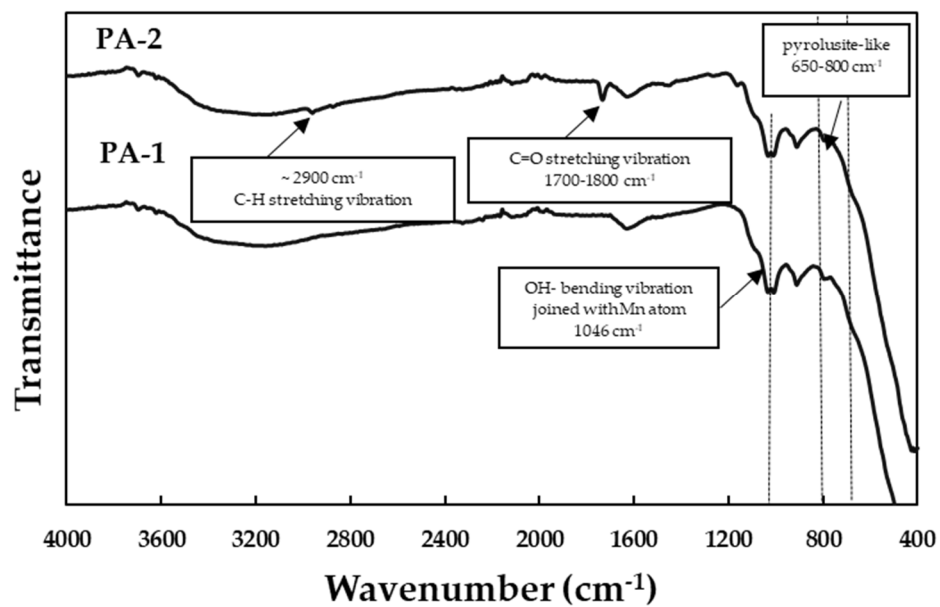

**Figure S1.** FTIR spectrum of PA-1 and PA-2 (measurement in a range of  $400\text{--}4000\text{ cm}^{-1}$ )

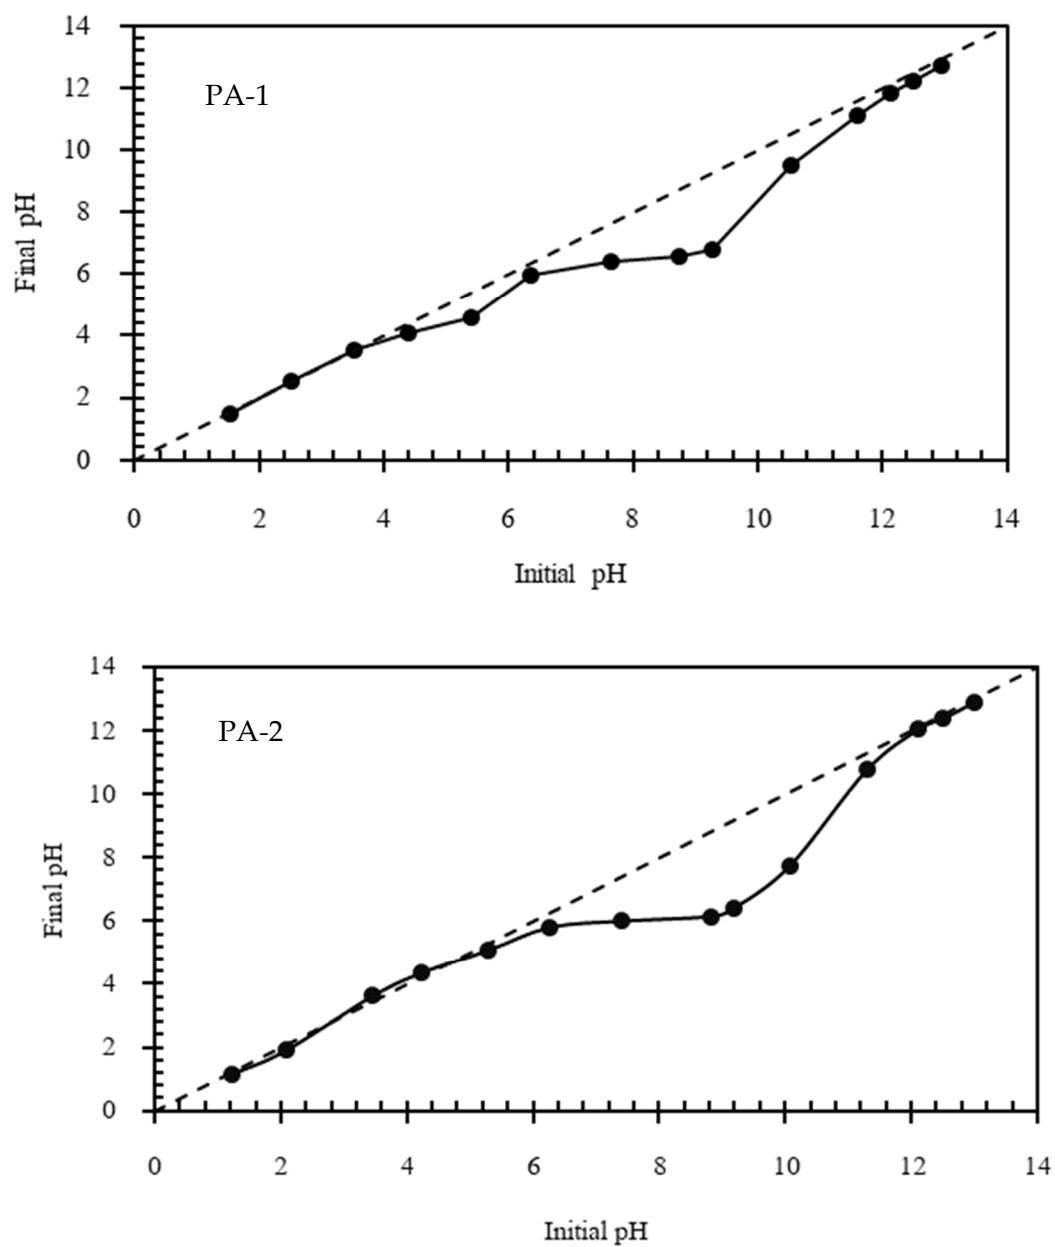

**Figure S2.** Point of Zero charge of PA-1 and PA-2 (The solid line represents experimental data, and the dashed line represents a pH ratio of 1:1).
